# Supplementary material
Source: MDPI journal article supplement (https://www.mdpi.com/2072-4292/16/5/732)
Supplement: s1 [file s1]

## Supplemental Materials:

# Variability in Symbiont Chlorophyll of Hawaiian Corals from Field and Airborne Spectroscopy

Gregory P. Asner <sup>1,2\*</sup>, Crawford Drury <sup>3</sup>, Nicholas R. Vaughn <sup>1</sup>, Joshua R. Hancock <sup>3</sup>, and Roberta E. Martin <sup>1,2</sup>

<sup>1</sup> Center for Global Discovery and Conservation Science, Arizona State University, Hilo, HI 96720, USA; [nickvaughn@asu.edu](mailto:nickvaughn@asu.edu) (N.R.V.); [roberta.martin@asu.edu](mailto:roberta.martin@asu.edu) (R.E.M.)

<sup>2</sup> School of Ocean Futures, Arizona State University, Hilo, HI 96720, USA

<sup>3</sup> Hawai'i Institute of Marine Biology, University of Hawai'i, Kaneohe, HI 96744, USA; [druryc@hawaii.edu](mailto:druryc@hawaii.edu) (C.D.); [hancock9@asu.edu](mailto:hancock9@asu.edu) (J.R.H.)

Figure S1

Figure S2

Table S1

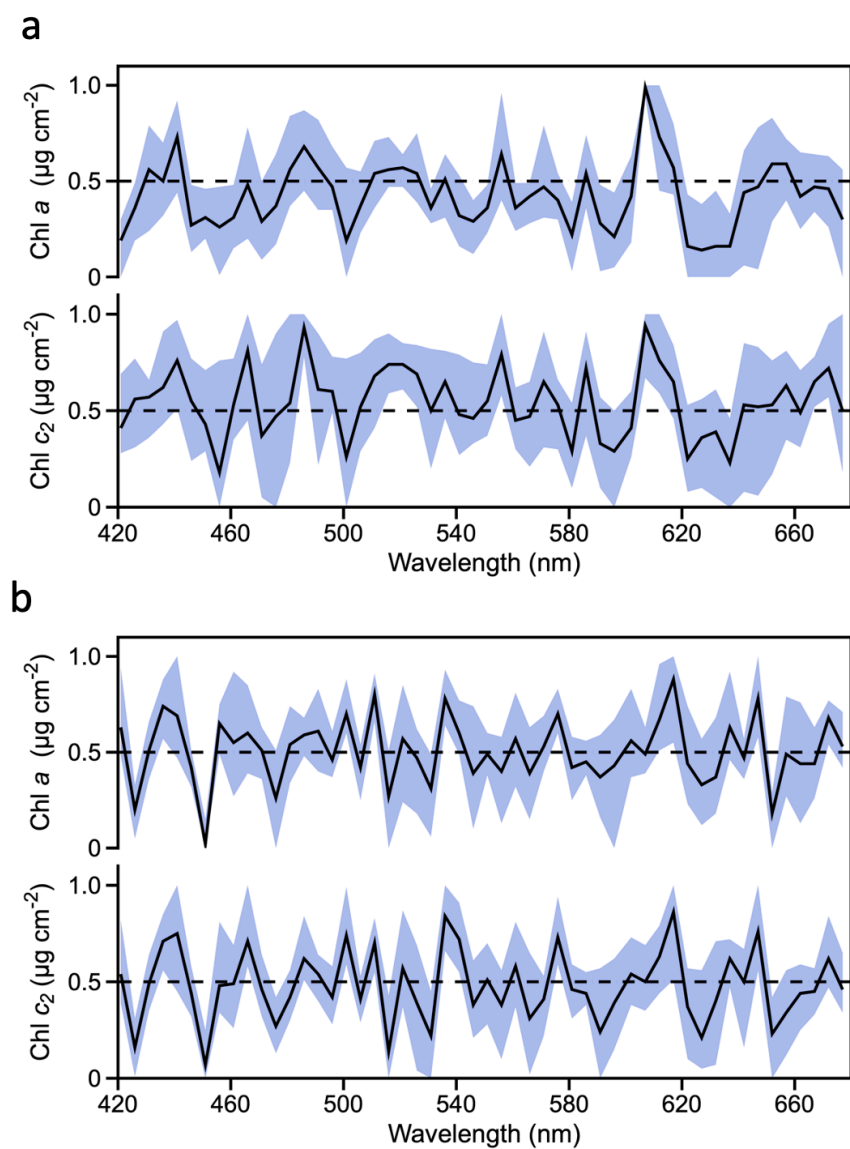

**Figure S1.** Mean and standard deviation of standardized spectral weighting vectors for Partial Least Squares Regression analyses of chemometric models of Chl *a* and Chl *c*<sub>2</sub> derived from (a) field spectroscopy and (b) airborne imaging spectroscopy.

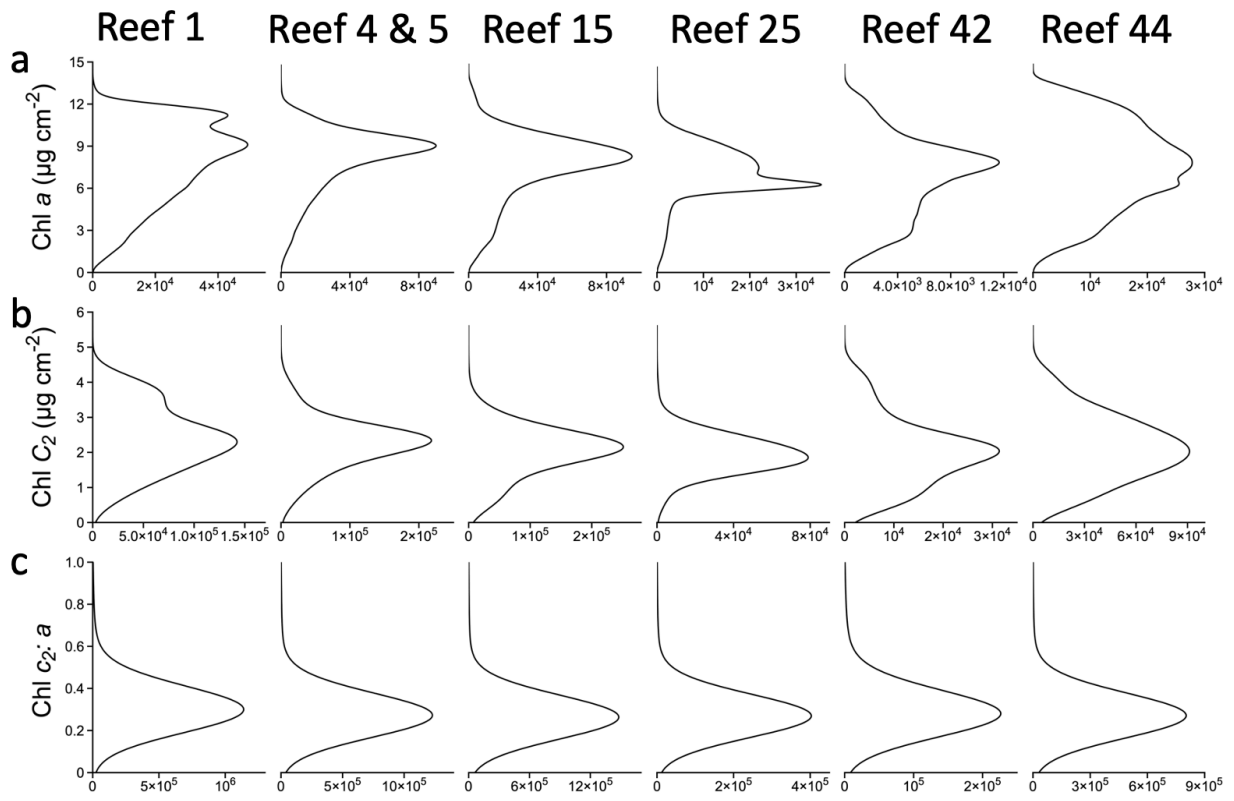

**Figure S2.** Distributions of (a) Chl *a*, (b) Chl *c*<sub>2</sub>, and (c) the ratio of Chl *c*<sub>2</sub>:*a* by patch reef named in Figure 1a.

**Table S1.** In situ chlorophyll concentrations, including mean, standard deviation and in parantheses minimum and maximum values for all samples combined as well as by species or each patch.

|           | Colonies | Samples | Chl a ( $\mu\text{g cm}^{-2}$ ) | Chl c2 ( $\mu\text{g cm}^{-2}$ ) |
|-----------|----------|---------|---------------------------------|----------------------------------|
| All data  | 59       | 147     | 6.15 $\pm$ 3.49; (0.47-13.68)   | 1.81 $\pm$ 0.98; (0.29-4.43)     |
| Montipora | 17       | 48      | 2.40 $\pm$ 1.21; (0.47-5.15)    | 0.80 $\pm$ 0.29; (0.29-1.50)     |
| Porites   | 42       | 99      | 7.99 $\pm$ 2.68; (2.28-13.68)   | 2.30 $\pm$ 0.80; (0.63-4.43)     |
| Patch 1   | 6        | 14      | 7.53 $\pm$ 1.97; (3.69-10.30)   | 2.26 $\pm$ 0.59; (1.10-2.89)     |
| Patch 4   | 5        | 11      | 3.62 $\pm$ 1.30; (2.16-6.80)    | 1.17 $\pm$ 0.43; (0.54-2.02)     |
| Patch 5   | 4        | 10      | 6.91 $\pm$ 3.66; (2.43-12.38)   | 1.57 $\pm$ 0.86; (0.72-2.76)     |
| Patch 13  | 23       | 60      | 6.77 $\pm$ 3.74; (0.90-13.68)   | 2.00 $\pm$ 1.14; (0.29-4.43)     |
| Patch 25  | 5        | 11      | 7.47 $\pm$ 1.35; (5.18-9.25)    | 2.38 $\pm$ 0.49; (1.29-3.17)     |
| Patch 42  | 12       | 32      | 5.01 $\pm$ 4.15; (0.47-12.59)   | 1.35 $\pm$ 0.86; (0.31-3.01)     |
| Patch 44  | 4        | 9       | 4.96 $\pm$ 1.78; (2.28-8.47)    | 1.67 $\pm$ 0.59; (1.19-2.94)     |
